# Supplementary material
Source: PubMed Central journal article supplement (PMC2141908)

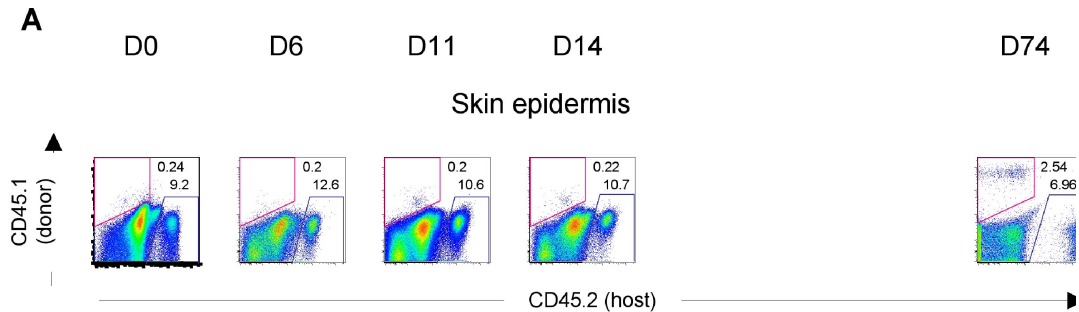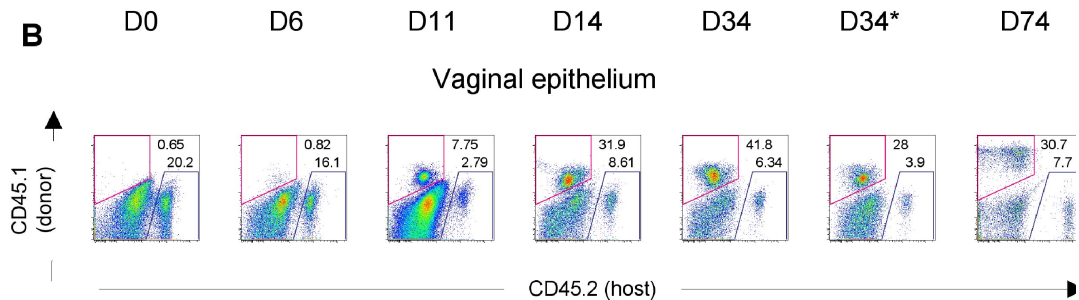

Supplement: pnas_0707179104_1.pdf [file pnas_0707179104_1.pdf]

Total BM cell (C) or  
monocyte (D) transfer  
(Donor: CD45.1)

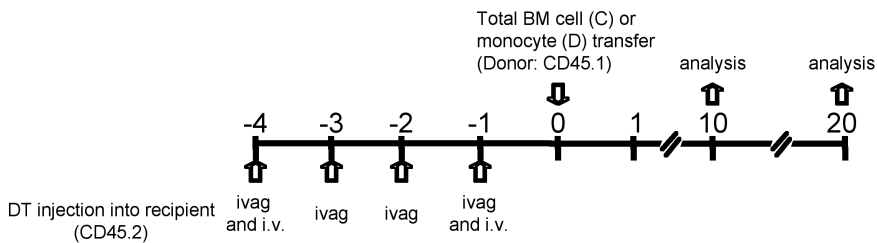

B

### D0 (CD11cDTR/GFP→WT[CD45.2])

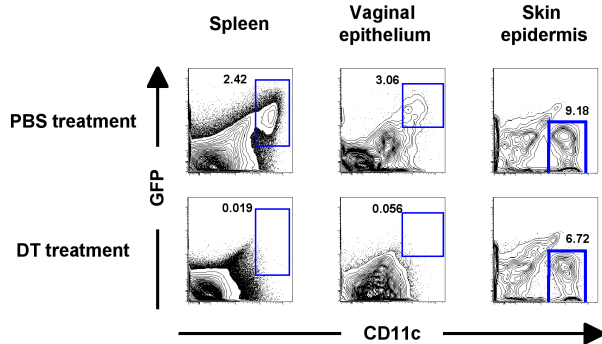

C

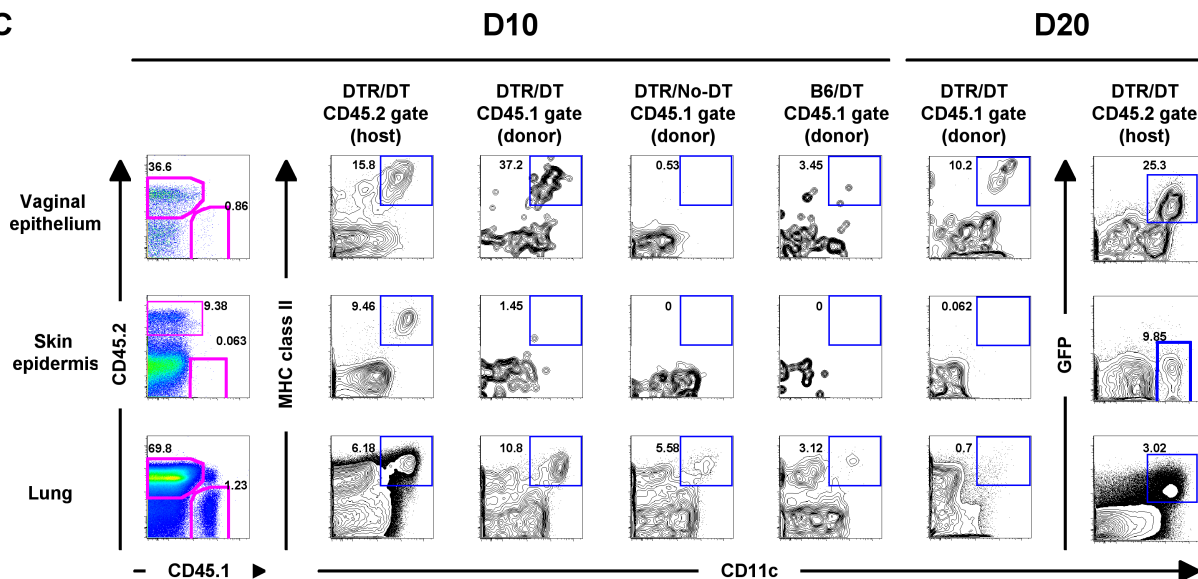

D

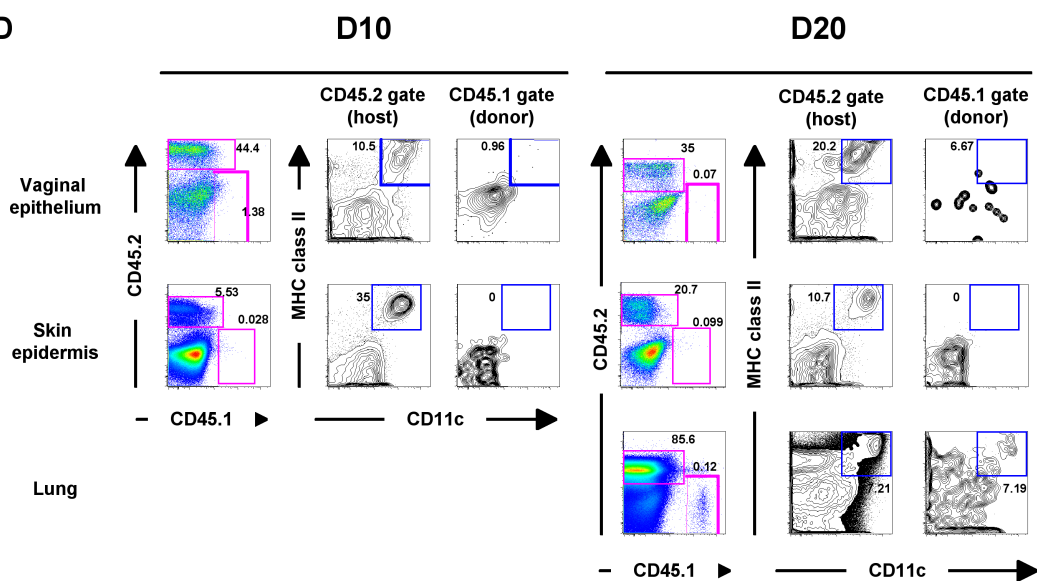

Supplement: pnas_0707179104_2.pdf [file pnas_0707179104_2.pdf]

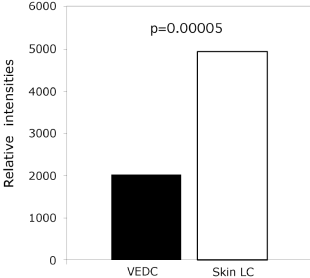

Supplement: pnas_0707179104_3.pdf [file pnas_0707179104_3.pdf]

**A**

iliac LN

↑  
CD8 $\alpha$ 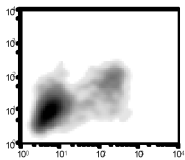↑  
CD11b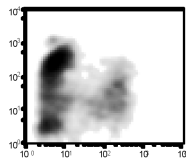↑  
CD205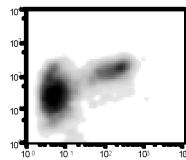↑  
CD86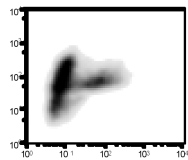**B**

Inguinal LN

↑  
CD8 $\alpha$ 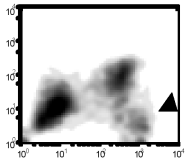↑  
CD11b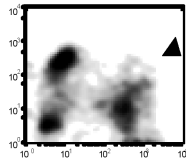↑  
CD205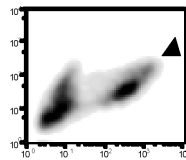↑  
CD86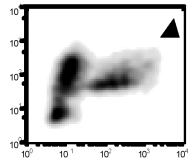↑  
CD207

Supplement: pnas_0707179104_5.pdf [file pnas_0707179104_5.pdf]

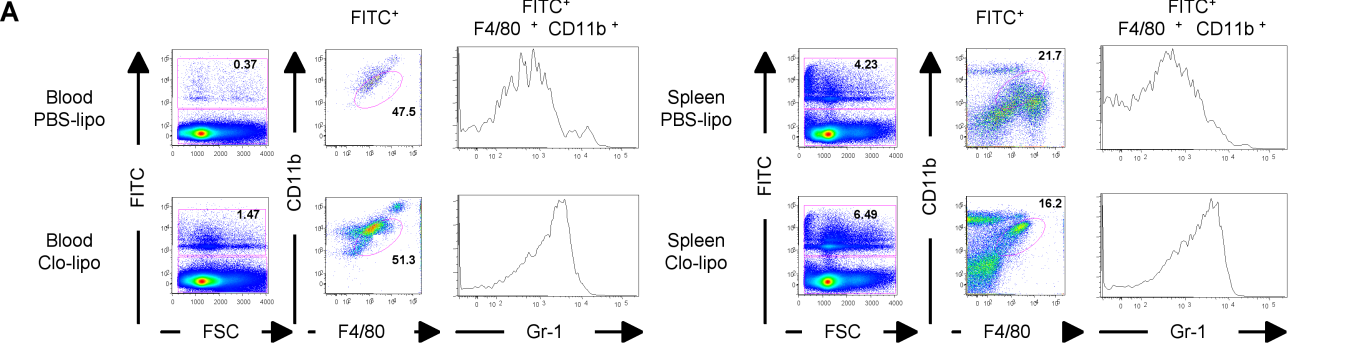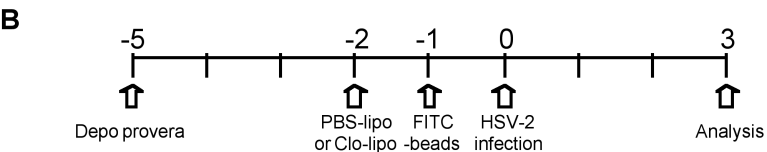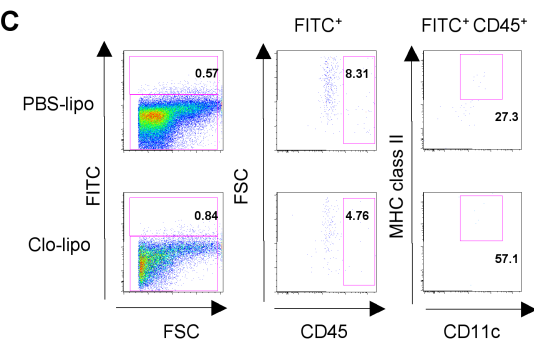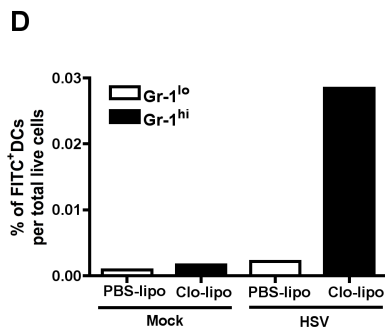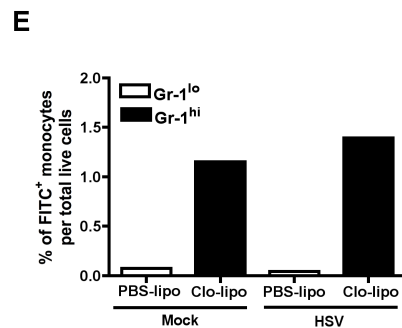

Supplement: pnas_0707179104_6.pdf [file pnas_0707179104_6.pdf]
